# Supplementary material
Source: PubMed Central journal article supplement (PMC6971780)

## SUPPLEMENTARY DATA

Article : Plasma and dietary linoleic acid and 3-year risk of type 2 diabetes after post-myocardial infarction: a prospective analysis in the Alpha Omega Cohort

Authors : Pertiwi, Wanders, Harbers, Küpers, Soedamah-Muthu, de Goede, Zock, Geleijnse.

### Contents:

|                         |                                                                                                                                                             |
|-------------------------|-------------------------------------------------------------------------------------------------------------------------------------------------------------|
| Supplementary Table S1  | Hazard ratios of plasma linoleic acid and incident type 2 diabetes (per 5%) in subgroups                                                                    |
| Supplementary Table S2  | Hazard ratios of plasma and dietary LA in quintiles and per 5% with incident type 2 diabetes in sensitivity analyses                                        |
| Supplementary Table S3  | Hazard ratios of plasma LA in quintiles and per 5% with incident type 2 diabetes, adjusting for potential confounding or intermediary factors one at a time |
| Supplementary Table S4  | Hazard ratios of specific plasma fatty acids and fatty acid ratios with incident type 2 diabetes                                                            |
| Supplementary Figure S1 | Flow diagram for selecting the population of analysis from the Alpha Omega Cohort                                                                           |

SUPPLEMENTARY DATA

**Supplementary Table S1.** Hazard ratios and 95%CI of plasma linoleic acid and incident type 2 diabetes (per 5%) in subgroups\*

| Subgroups                               | HR (per 5 %)      | <i>P</i> for interaction |
|-----------------------------------------|-------------------|--------------------------|
| <b>Sex</b>                              |                   |                          |
| Men (n=2,621)                           | 0.81 (0.67, 0.96) | 0.009                    |
| Women (n=636)                           | 0.47 (0.33, 0.68) |                          |
| <b>Age</b>                              |                   |                          |
| < 65 y (n=966)                          | 0.84 (0.62, 1.12) | 0.28                     |
| ≥ 65 y (n=2,291)                        | 0.69 (0.57, 0.83) |                          |
| <b>Body mass index</b>                  |                   |                          |
| < 30 kg/m <sup>2</sup> (n=2,604)        | 0.72 (0.60, 0.87) | 0.96                     |
| ≥ 30 kg/m <sup>2</sup> (n=653)          | 0.72 (0.53, 0.97) |                          |
| <b>Alcohol intake<sup>†</sup></b>       |                   |                          |
| No (n=132)                              | 0.49 (0.25, 0.96) | 0.42                     |
| Low (n=1,672)                           | 0.70 (0.56, 0.87) |                          |
| Moderate (n=907)                        | 0.88 (0.64, 1.21) |                          |
| High (n=546)                            | 0.72 (0.49, 1.06) |                          |
| <b>Statin use</b>                       |                   |                          |
| Yes (n=2,815)                           | 0.70 (0.58, 0.83) | 0.19                     |
| No (n=442)                              | 0.94 (0.62, 1.43) |                          |
| <b>Time since myocardial infarction</b> |                   |                          |
| >5 years (n=1190)                       | 0.78 (0.60, 1.02) | 0.68                     |
| ≤5 years (n=2038)                       | 0.71 (0.58, 0.86) |                          |

\* Hazard Ratios with 95% confidence intervals were obtained by Cox regression analysis, using the fully adjusted model (model 2, described in text, Statistical Analysis);

† Categorized as “no: 0 g/d”, “low: >0 to 10 g/d”, “moderate: >10 to 20 g/d for women and >10 to 30 g/d for men”, and “high: >20 g/d for women and >30 g/d for men”;

SUPPLEMENTARY DATA

**Supplementary Table S2.** Hazard ratios of dietary and plasma LA in quintiles and per 5% with incident type 2 diabetes including only patients without prediabetes at baseline (n=3,073)<sup>\*, †</sup>

| Exposure                        | N cases | Q1   | Q2                | Q3                | Q4                | Q5                | <i>P</i> -trend <sup>‡</sup> | Per 5%            | <i>P</i> -value |
|---------------------------------|---------|------|-------------------|-------------------|-------------------|-------------------|------------------------------|-------------------|-----------------|
| Plasma LA (% total fatty acids) | 138     | 1.00 | 0.70 (0.43, 1.14) | 0.63 (0.38, 1.06) | 0.62 (0.37, 1.03) | 0.50 (0.28, 0.88) | 0.014                        | 0.76 (0.63, 0.91) | 0.003           |
| Dietary LA (en%)                | 138     | 1.00 | 0.75 (0.43, 1.29) | 0.91 (0.51, 1.62) | 1.10 (0.58, 2.10) | 0.82 (0.34, 1.99) | 0.98                         | 1.16 (0.54, 2.51) | 0.70            |

\* Hazard Ratios with 95% confidence intervals were obtained by Cox regression analysis, using the fully adjusted model (model 2 for plasma LA and model 3 for dietary LA, described in text, Statistical Analysis);

† Sensitivity analyses excluding patients with prediabetes at baseline. Prediabetes was defined as plasma glucose between 6.1-6.9 mmol/L after ≥4 h of fasting;

‡ *P*-values for trend were obtained by assigning each patient median plasma or dietary LA for the category and modeled these values as continuous; en%, percentage of total energy intake, excluding energy from alcohol; LA, linoleic acid; Q, quintile; SFA, saturated fatty acids; TFA, trans fatty acids.

SUPPLEMENTARY DATA

**Supplementary Table S3.** Hazard ratios of plasma LA in quintiles and per 5% with incident type 2 diabetes, adjusting for potential confounding or intermediary factors one at a time\*

|                                                        | Quintiles of plasma LA (%) |                   |                   |                   |                   | <i>P</i> -trend <sup>†</sup> | Per 5%            | <i>P</i> -value |
|--------------------------------------------------------|----------------------------|-------------------|-------------------|-------------------|-------------------|------------------------------|-------------------|-----------------|
|                                                        | Q1<br>(n=652)              | Q2<br>(n=650)     | Q3<br>(n=651)     | Q4<br>(n=653)     | Q5<br>(n=651)     |                              |                   |                 |
| Median, % total FA                                     | 43.9                       | 47.6              | 50.1              | 52.8              | 56.3              |                              |                   |                 |
| Cases                                                  | 49                         | 38                | 31                | 31                | 22                |                              |                   |                 |
| Model 2                                                | 1.00                       | 0.74 (0.48, 1.14) | 0.64 (0.40, 1.00) | 0.60 (0.38, 0.94) | 0.44 (0.26, 0.75) | 0.001                        | 0.73 (0.62, 0.86) | <0.001          |
| + Triacylglycerol, mmol/L                              | 1.00                       | 0.77 (0.50, 1.18) | 0.65 (0.41, 1.03) | 0.64 (0.40, 1.02) | 0.47 (0.28, 0.80) | 0.003                        | 0.76 (0.64, 0.89) | <0.001          |
| + Palmitic acid (16:0), % total FA                     | 1.00                       | 0.80 (0.52, 1.26) | 0.72 (0.44, 1.19) | 0.71 (0.42, 1.20) | 0.58 (0.30, 1.10) | 0.09                         | 0.77 (0.62, 0.96) | 0.020           |
| + Palmitoleic to palmitic acid ratio<br>(16:1n-7/16:0) | 1.00                       | 0.81 (0.52, 1.26) | 0.73 (0.44, 1.18) | 0.70 (0.42, 1.16) | 0.53 (0.30, 0.95) | 0.030                        | 0.77 (0.64, 0.93) | 0.008           |
| + Oleic acid (18:1n-9), % total FA                     | 1.00                       | 0.85 (0.54, 1.34) | 0.78 (0.47, 1.32) | 0.80 (0.45, 1.40) | 0.66 (0.33, 1.30) | 0.25                         | 0.80 (0.63, 1.03) | 0.09            |

\* Hazard Ratios with 95% confidence intervals were obtained by Cox regression analysis, using the fully adjusted model (model 2, described in text, Statistical Analysis);

† *P*-values for trend were obtained by assigning each patient median plasma LA for the category and we modeled these values as continuous; FA, fatty acids; LA, linoleic acid.

SUPPLEMENTARY DATA

**Supplementary Table S4.** Hazard ratios of specific plasma fatty acids and fatty acid ratios with incident type 2 diabetes\*

|                                                       |         | Quintiles of plasma or plasma ratios of FA |                   |                   |                   |                   | <i>P</i> -trend <sup>†</sup> |
|-------------------------------------------------------|---------|--------------------------------------------|-------------------|-------------------|-------------------|-------------------|------------------------------|
|                                                       |         | Q1                                         | Q2                | Q3                | Q4                | Q5                |                              |
| Palmitic acid (16:0), % total FA                      | N       | 651                                        | 652               | 649               | 653               | 652               |                              |
|                                                       | Median  | 10.3                                       | 10.9              | 11.2              | 11.7              | 12.2              |                              |
|                                                       | Cases   | 20                                         | 33                | 34                | 39                | 45                |                              |
|                                                       | Model 2 | 1.00                                       | 1.69 (0.97, 2.94) | 1.76 (1.01, 3.07) | 2.02 (1.18, 3.49) | 2.23 (1.30, 3.80) | 0.003                        |
| Oleic acid (18:1n-9), % total FA                      | N       | 652                                        | 649               | 653               | 653               | 650               |                              |
|                                                       | Median  | 15.1                                       | 16.6              | 17.7              | 18.8              | 20.6              |                              |
|                                                       | Cases   | 17                                         | 31                | 38                | 42                | 43                |                              |
|                                                       | Model 2 | 1.00                                       | 1.83 (1.01, 3.31) | 2.27 (1.28, 4.05) | 2.43 (1.38, 4.30) | 2.65 (1.49, 4.72) | <0.001                       |
| Liver fat proxy (16:0/18:2n-6)                        | N       | 651                                        | 652               | 651               | 652               | 651               |                              |
|                                                       | Median  | 0.18                                       | 0.21              | 0.22              | 0.24              | 0.27              |                              |
|                                                       | Cases   | 19                                         | 32                | 36                | 39                | 45                |                              |
|                                                       | Model 2 | 1.00                                       | 1.70 (0.96, 3.00) | 1.90 (1.09, 3.32) | 2.07 (1.19, 3.60) | 2.38 (1.38, 4.12) | 0.002                        |
| Estimated D5D activity (20:4n-6/20:3n-6) <sup>‡</sup> | N       | 647                                        | 648               | 648               | 648               | 647               |                              |
|                                                       | Median  | 6.8                                        | 8.7               | 10.1              | 11.9              | 15.0              |                              |
|                                                       | Cases   | 38                                         | 40                | 31                | 35                | 23                |                              |
|                                                       | Model 2 | 1.00                                       | 1.09 (0.70, 1.70) | 0.84 (0.52, 1.36) | 1.04 (0.66, 1.66) | 0.72 (0.43, 1.22) | 0.23                         |
| Estimated D6D activity (18:3n-6/18:2n-6)              | N       | 651                                        | 652               | 651               | 652               | 651               |                              |
|                                                       | Median  | 0.011                                      | 0.015             | 0.019             | 0.023             | 0.031             |                              |
|                                                       | Cases   | 25                                         | 26                | 34                | 42                | 44                |                              |
|                                                       | Model 2 | 1.00                                       | 1.01 (0.58, 1.75) | 1.31 (0.77, 2.21) | 1.66 (1.00, 2.77) | 1.74 (1.04, 2.91) | 0.008                        |

\* Hazard Ratios with 95% confidence intervals were obtained by Cox regression analysis, using the fully adjusted model (Model 2 described in text, Statistical Analysis);

<sup>†</sup> P-values for trend were obtained by assigning each patient median plasma FA or ratio of plasma FA for the category and we modeled these values as continuous;

<sup>‡</sup> Estimated D5D activity was only calculated for 3,238 patients with non-zero values for their 20:3n-6 levels; D5D, delta-5-desaturase; D6D, delta-6-desaturase; FA, fatty acid.

SUPPLEMENTARY DATA

**Supplementary Figure S1.** Flow diagram for selecting the population of analysis from the Alpha Omega Cohort. CE, cholesteryl esters; FA, fatty acids; UFA, unsaturated fatty acids.

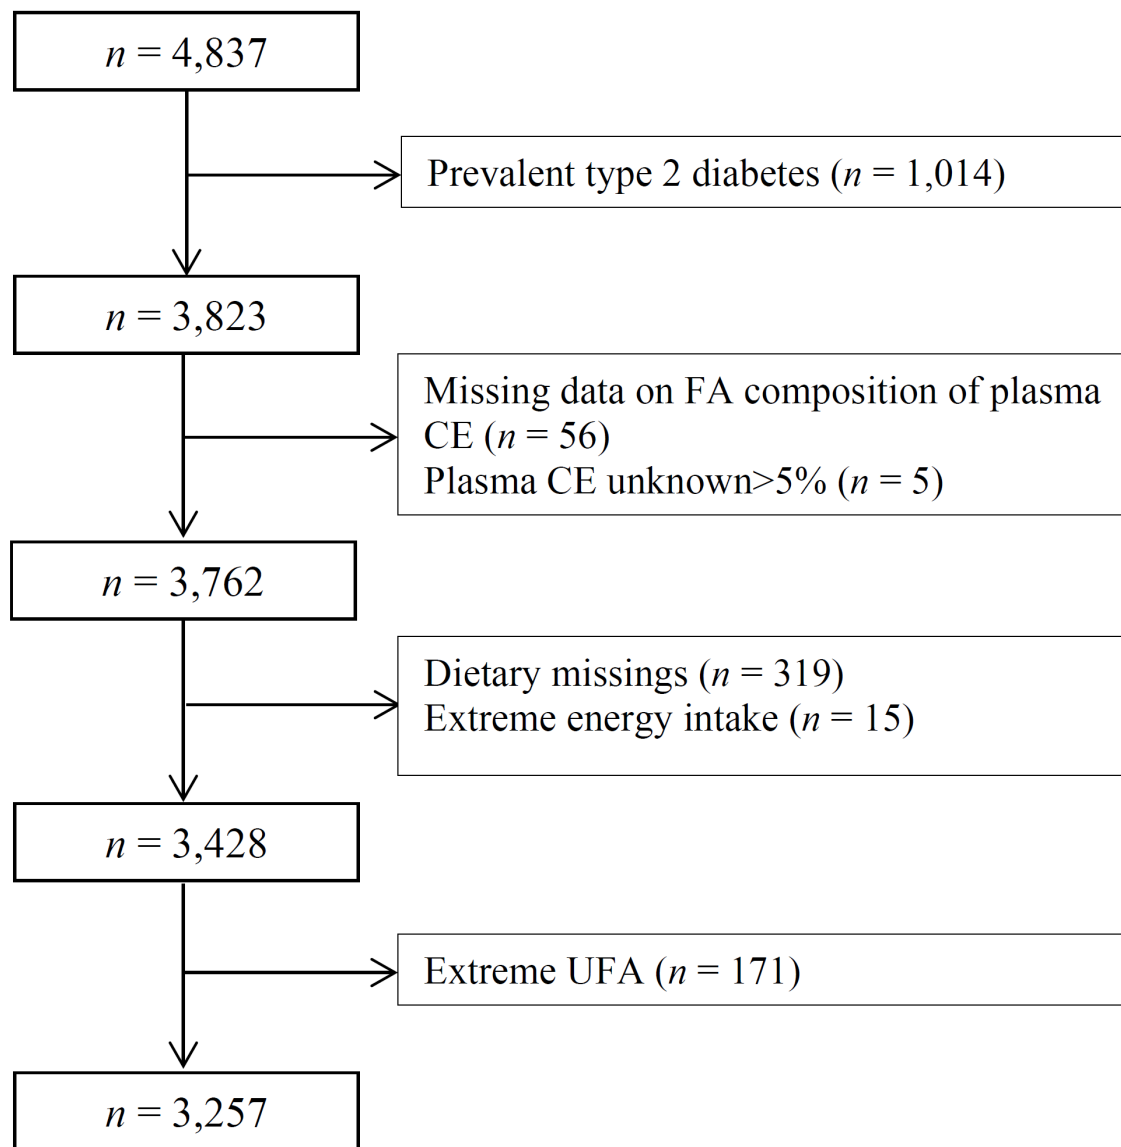

Supplement: DC191483SupplementaryData.pdf [file DC191483SupplementaryData.pdf]
